# Supplementary material for: Adsorption properties and structure of CO2 adsorbed on open coordination sites of metal–organic framework Ni2(dhtp) from gas adsorption, IR spectroscopy and X-ray diffraction
Source: Royal Society of Chemistry journal article supplement (doi:10.1039/b810574j), 2008-01-01
Supplement: b810574j.pdf [file b810574j.pdf]

Supplementary information for

**Adsorption properties and structure of CO<sub>2</sub> adsorbed on open coordination sites of metal-organic framework Ni<sub>2</sub>(dhtp) from gas adsorption, IR spectroscopy and X-ray diffraction**

Pascal D. C. Dietzel,<sup>a</sup> Rune E. Johnsen,<sup>b</sup> Helmer Fjellvåg,<sup>b</sup> Silvia Bordiga,<sup>c</sup> Elena Groppo,<sup>c</sup>  
Sachin Chavan,<sup>c</sup> Richard Blom<sup>a,\*</sup>

Richard.Blom@sintef.no

### **Details of the structure determination of Ni<sub>2</sub>(dhtp)/CO<sub>2</sub>:**

High-resolution X-ray powder diffraction data of the CPO-27-Ni-CO<sub>2</sub> was recorded at the Swiss-Norwegian Beamlines (SNBL/BM01B) at the European Synchrotron Radiation Facility (ESRF) using a two-circle diffractometer equipped with 6 counting chains and a wavelength of 0.520054 Å.

For sample preparation, material CPO-2-Ni in a tube was activated at 383 K in a dynamic vacuum for more than two hours. The activated material was transferred into a capillary of 1 mm diameter in a glove box. The capillary was attached to a vacuum line and exposed to the adsorbate gas. The setup unfortunately only allows an estimate of the partial pressure of adsorbate that the material experiences, which in the present case is in the range 0.2-0.5 atm (at ambient temperature). The capillary was cooled somewhat before it was sealed.

The structure of the CPO-27-Ni-CO<sub>2</sub> sample measured at 100 K was refined using the Rietveld refinement program WINPOW (Ståhl 2008). The starting model for the refinement was based on the previously reported single-crystal solution of the dehydrated CPO-27-Ni (Dietzel 2006). The positions of the atoms in the CO<sub>2</sub> molecule were found by means of difference Fourier calculations. A split pseudo-Voigt function with seven profile parameters was used for the refinements over a 2θ range of 1.027 - 25.499° (with a step size of 0.004°) in order to cope with the asymmetry of the diffraction peaks at low scattering angle. The pattern was corrected for polarization and cylinder absorption. The scale factor, the unit cell parameters, and the 2θ zero-point shift were refined. Eight Chebyshev-background parameters were used to describe the background and nineteen soft distance restraints were used to restrain the distances and angles within the ligand. Two soft distance restraints were applied to the C–O distances within the CO<sub>2</sub> molecule. All the atomic coordinates (except for the H atom) and the occupancy factor of the atoms sites of the CO<sub>2</sub> molecule were refined. The position of the H atom was geometrically constructed. The isotropic atomic temperature factors of the carbon and hydrogen positions and the oxygen positions in the 2,5-dioxidoterephthalate moiety were coupled and subsequently refined, whereas the isotropic atomic temperature factors of the nickel position and the carbon and oxygen positions in the CO<sub>2</sub> molecules were refined individually. The O–O distance in the CO<sub>2</sub> molecule was also tried to be strongly restraint in order to get a linearly CO<sub>2</sub> molecule, but the refinement did not converge.

### **References**

- P. D. C. Dietzel, B. Panella, M. Hirscher, R. Blom, H. Fjellvåg, *Chem. Commun.* 2006, 959.  
K. Ståhl, WINPOW, Version 28-FEB-2008, 2008.

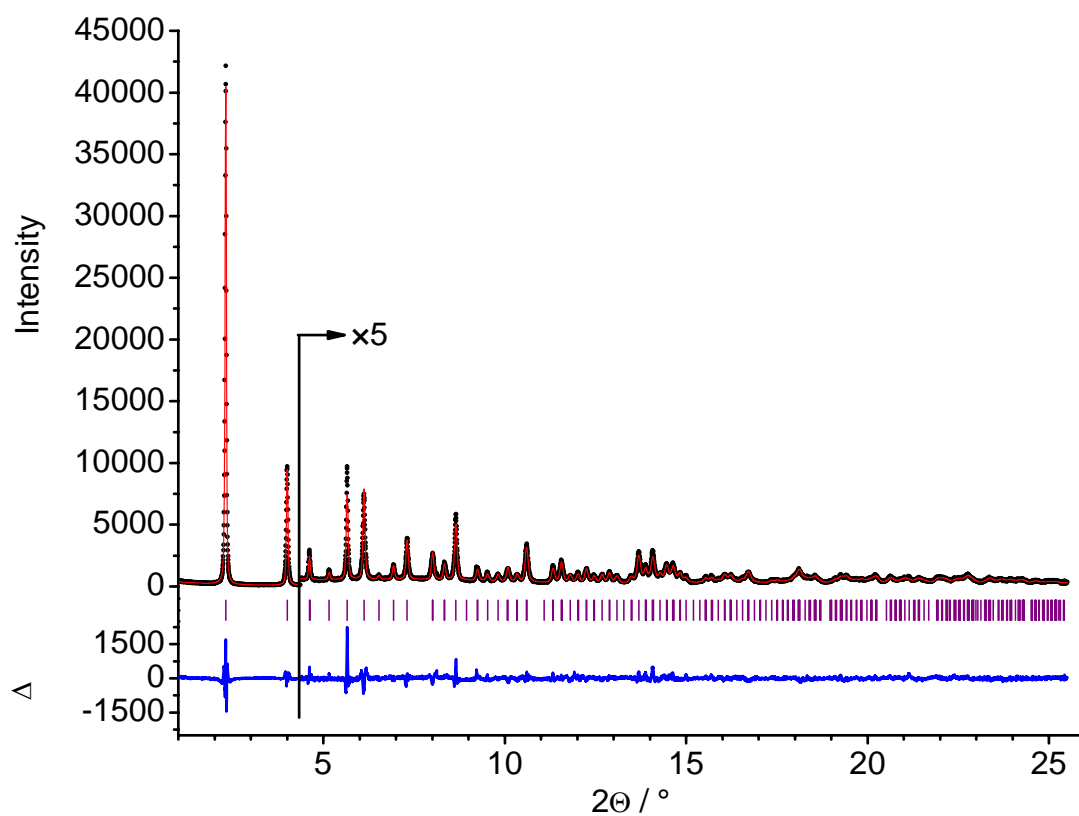

**Figure S1.** Experimental (black circles), calculated (red line), and difference (blue line) X-ray powder diffraction patterns of  $\text{Ni}_2(\text{dhtp})/\text{CO}_2$ . The tick marks show the positions of the Bragg reflections. Intensities and difference plot of the high-angle part are enlarged by a factor of 5.

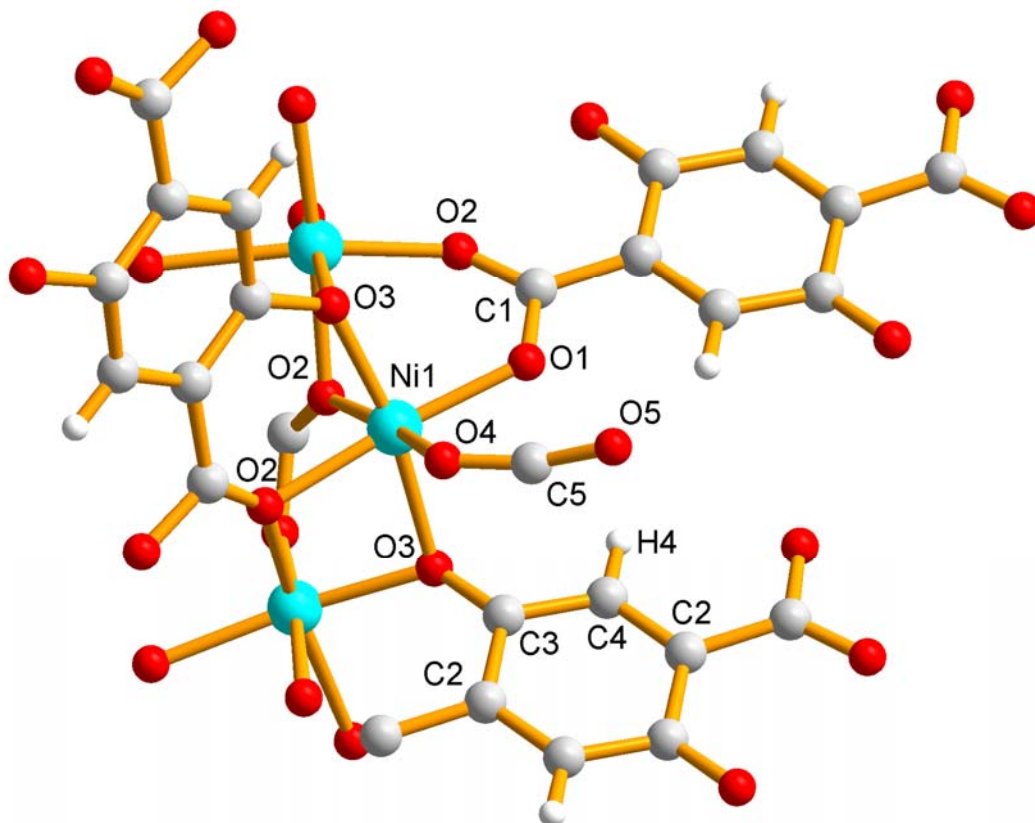

**Figure S2.** Atom labelling scheme used in the structure determination of Ni<sub>2</sub>(dhtp)/CO<sub>2</sub>.

**Table S1.** Crystallographic data for the Rietveld refinement of Ni<sub>2</sub>(dhtp)/CO<sub>2</sub>.

|                                 |                          |
|---------------------------------|--------------------------|
| Temperature                     | 100 K                    |
| Space group                     | <i>R</i> 3; <sup>-</sup> |
| <i>Z</i>                        | 18                       |
| <i>A</i>                        | 25.7836(11) Å            |
| <i>C</i>                        | 6.7474(3) Å              |
| <i>V</i>                        | 3884.7(5) Å <sup>3</sup> |
| $\lambda$                       | 0.520054 Å               |
| $\rho_{\text{cal}}$             | 1.425 g/cm <sup>3</sup>  |
| 2 $\theta$ range                | 1.027 - 25.499°          |
| <i>R</i> <sub>p</sub>           | 5.90 %                   |
| <i>R</i> <sub>wp</sub>          | 8.14 %                   |
| <i>R</i> <sub>exp</sub>         | 2.64 %                   |
| <i>R</i> <sub>Bragg</sub>       | 1.56 %                   |
| GoF                             | 3.09                     |
| No. of observations             | 6119                     |
| No. of reflections              | 626                      |
| No. of parameters               | 59                       |
| No. of soft distance restraints | 21                       |

**Table S2.** Atomic coordinates and equivalent isotropic displacement parameters for Ni<sub>2</sub>(dhtp)/CO<sub>2</sub>.

| Atom | <i>x</i> / <i>a</i> | <i>y</i> / <i>b</i> | <i>z</i> / <i>c</i> | s.o.f   | <i>U</i> <sub>iso</sub> |
|------|---------------------|---------------------|---------------------|---------|-------------------------|
| C1   | .4152(7)            | .4047(7)            | .2551(17)           | 1.0000  | .003(4)                 |
| C2   | .4593(6)            | .4517(6)            | .1202(19)           | 1.0000  | .003(4)                 |
| C3   | .5557(4)            | .5478(5)            | .0841(18)           | 1.0000  | .003(4)                 |
| C4   | .5145(6)            | .4955(6)            | .1970(14)           | 1.0000  | .003(4)                 |
| H4   | .52573              | .49429              | .33325              | 1.0000  | .003(4)                 |
| Ni1  | .61906(13)          | .64921(13)          | .3531(4)            | 1.0000  | .0102(8)                |
| O1   | .4357(4)            | .4041(5)            | .4355(16)           | 1.0000  | .002(2)                 |
| O2   | .3663(5)            | .3629(5)            | .2172(14)           | 1.0000  | .002(2)                 |
| O3   | .6103(3)            | .5825(4)            | .1623(17)           | 1.0000  | .002(2)                 |
| C5   | .1766(9)            | .7214(12)           | .079(4)             | .668(8) | .049(13)                |
| O4   | .6807(7)            | .5536(9)            | .883(2)             | .668(8) | .015(8)                 |
| O5   | .2284(9)            | .7493(13)           | .025(5)             | .668(8) | .26(2)                  |

**Some details of the adsorption experiments with Ni<sub>2</sub>(dhtp):**

Adsorption isotherms up to around 1 atmosphere pressure were recorded on a Quantachrome A1 instrument using either N<sub>2</sub> (5.0) or CO<sub>2</sub> (4.6) as adsorbates. Prior to all measurements the sample was outgassed at 110°C for approx. 16 hrs. Nitrogen adsorption measurements were carried out at 77K (liquid N<sub>2</sub> as coolant) to estimate the specific surface area of Ni<sub>2</sub>(dhtp) by using either the Langmuir or BET methods. Carbon dioxide isotherms were recorded at different temperatures keeping the sample at a stable temperature by using a thermostated water bath. The same sample was used in several adsorption experiments by regenerating the adsorbent between each run. Regeneration was carried out by heating the sample to 110°C for 16 hrs. After regeneration the adsorption isotherms were fully reproducible.

**Some more details of the IR experiments with Ni<sub>2</sub>(dhtp)/CO<sub>2</sub>:**

At high coverage the band associated with  $\nu_3$  and  $\nu_2$  modes of Ni<sup>2+</sup>...<sup>12</sup>CO<sub>2</sub> adducts goes rapidly out of scale and spectra evolution can be followed only by monitoring the corresponding modes of the Ni<sup>2+</sup>...<sup>13</sup>CO<sub>2</sub> adducts. In particular, as the band at 2275 cm<sup>-1</sup>, becomes more and more intense without any appreciable shift in frequency, the formation of Ni<sup>2+</sup>...(CO<sub>2</sub>)<sub>2</sub> species (observed in some cases of exchanged zeolites)<sup>1</sup> can be excluded.

In the low frequency range, an intense band is expected for doubly degenerate bending mode ( $\nu_2$ ) of CO<sub>2</sub> (gas frequency at 668 cm<sup>-1</sup>). In this case (see the inset in Fig. S3), a doublet at 659 and 651 cm<sup>-1</sup> is clearly visible, testifying that the molecule is weakly perturbed and also might

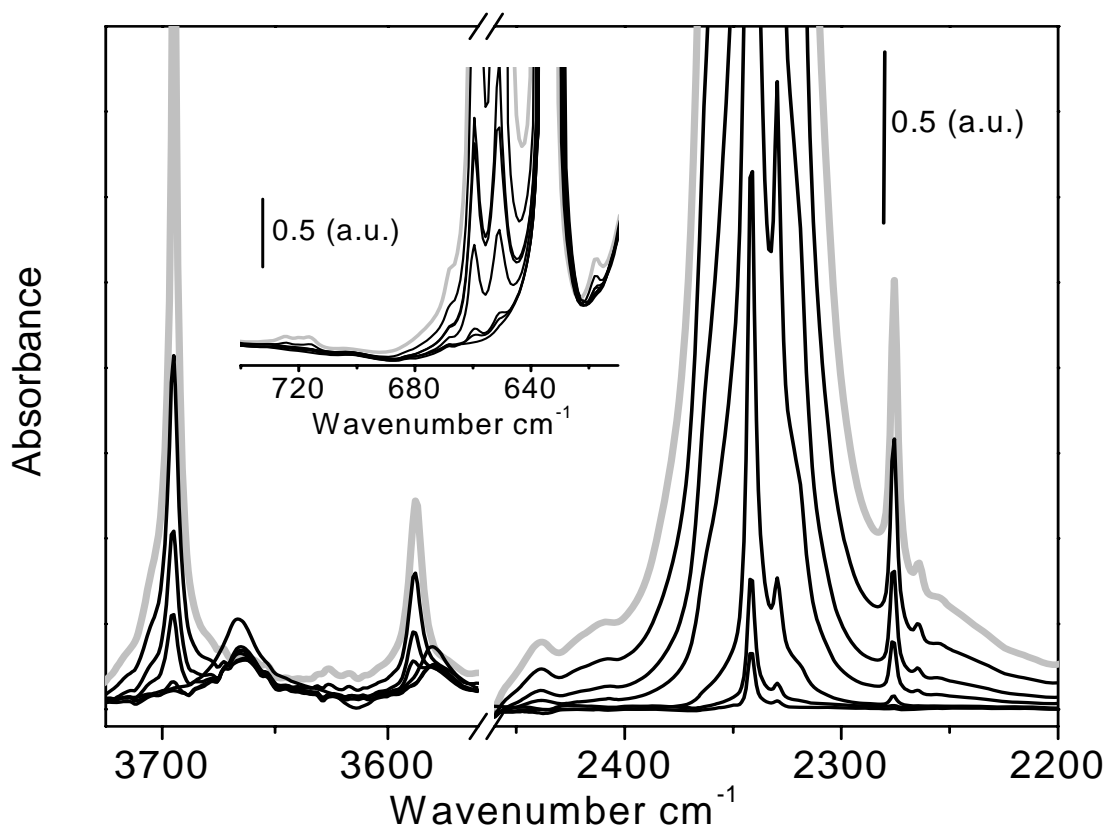

**Figure S3:** FTIR spectra (background subtracted) of CO<sub>2</sub> adsorbed on CPO-27-Ni at decreasing equilibrium pressure (higher coverage, grey curve corresponds to 0.02 atm equilibrium pressure). In the inset the CO<sub>2</sub> bending region is reported.

be slightly distorted. On the high and low frequency sides of these peaks, very weak bands are growing. In particular a doublet at 725 and 716  $\text{cm}^{-1}$  can be assigned to  $\nu_2 + \nu_{\text{M-O}}$ , and the 617  $\text{cm}^{-1}$  band can be explained as  $\nu_2$   $^{13}\text{CO}_2$ .

In case of alkaline and alkaline earth metals exchanged zeolites, e.g. for Mg-ETS-10, the formation of carbonates<sup>ii</sup> has been evinced by the doublet at 1620 and 1380  $\text{cm}^{-1}$ . In CPO-27-Ni, the strong absorptions associated to the carboxylate modes avoid any spectral inspection in the range 1600-1300  $\text{cm}^{-1}$ , however, as no appreciable change has been observed where the asymmetric mode of the carbonate is expected (1620  $\text{cm}^{-1}$ ), this allows to exclude the formation of these species.

At high coverage the band associated with  $\nu_3$  and  $\nu_2$  modes of  $\text{Ni}^{2+\dots12}\text{CO}_2$  adducts goes rapidly out of scale and spectra evolution can be followed only by monitoring the corresponded modes of the  $\text{Ni}^{2+\dots13}\text{CO}_2$  adducts. In particular, as the band at 2275  $\text{cm}^{-1}$ , becomes more and more intense without any appreciable shift in frequency, the formation of  $\text{Ni}^{2+\dots}(\text{CO}_2)_2$  species (observed in some cases of exchanged zeolites<sup>iii</sup>) can be excluded.

Upon increasing the equilibrium pressure the bands associated to combination modes of  $\nu_1$  and  $\nu_3$  become very intense and shift at 3587  $\text{cm}^{-1}$  and 3694  $\text{cm}^{-1}$  indicating the filling of the cages. The shift in these components and broadening of the  $\nu_3$  mode of the  $\text{Ni}^{2+\dots}\text{CO}_2$  can be associated with the contribution of physisorbed  $\text{CO}_2$  which cause a change in dielectric constant.

---

<sup>i</sup> B. Bonelli, B. Onida, B. Fubini, C. Otero Areán, E. Garrone *Langmuir* 2000, **16**, 4976.

<sup>ii</sup> F.X. Llabrés i Xamena and A. Zecchina, *Phys. Chem. Chem. Phys.*, 2002, **4**, 1978.

<sup>iii</sup> B. Bonelli, B. Onida, B. Fubini, C. Otero Areán, E. Garrone *Langmuir* 2000, **16**, 4976.
